# Supplementary material for: Ionic liquid gated unipolar inverters with tunable switching voltage and excellent noise margin
Source: Royal Society of Chemistry journal article supplement (doi:10.1039/d2tc03282a), 2022-12-12
Supplement: d2tc03282a1.pdf [file d2tc03282a1.pdf]

# Supplementary Information

## Ionic-Liquid Gated Unipolar Inverters with Tunable Switching Voltage and Excellent Noise Margin

Yogesh Yadav and Samarendra Pratap Singh\*

Department of Physics, Shiv Nadar University, Gautam Budh Nagar, Uttar Pradesh, India - 201314

Correspondence e-mail: [samarendra.singh@snu.edu.in](mailto:samarendra.singh@snu.edu.in)

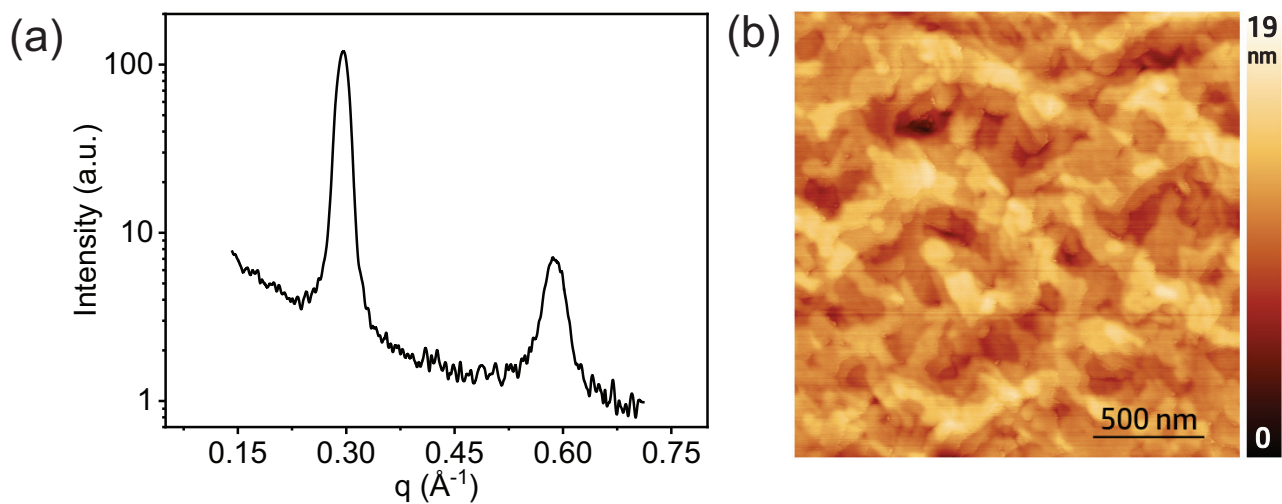

Figure S1: (a) The x-ray diffractogram, and (b) AFM micrograph of the thin film of PBTTT-C14 spin-coated on glass and annealed at 150 °C. The lamellar spacing determined using the XRD peaks is 21.2 Å.

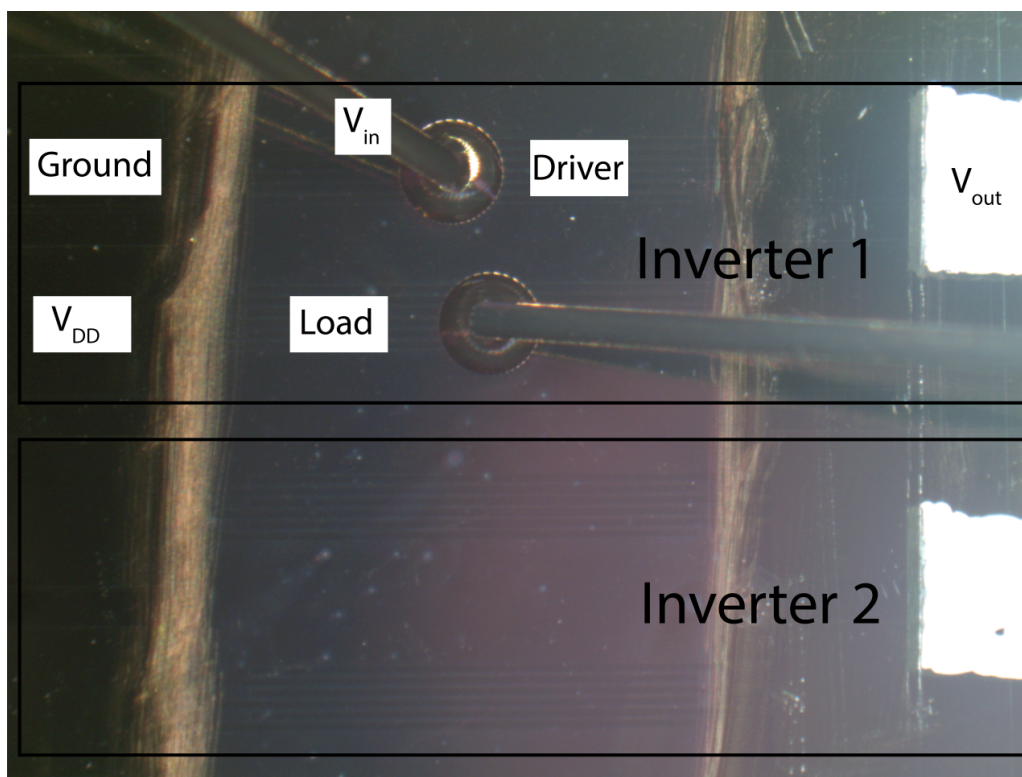

Figure S2: A photo of the IL-gated inverter with different electrical connections labeled. The patch for  $V_{out}$  is made using silver paste and connects terminals of the driver and the load together.

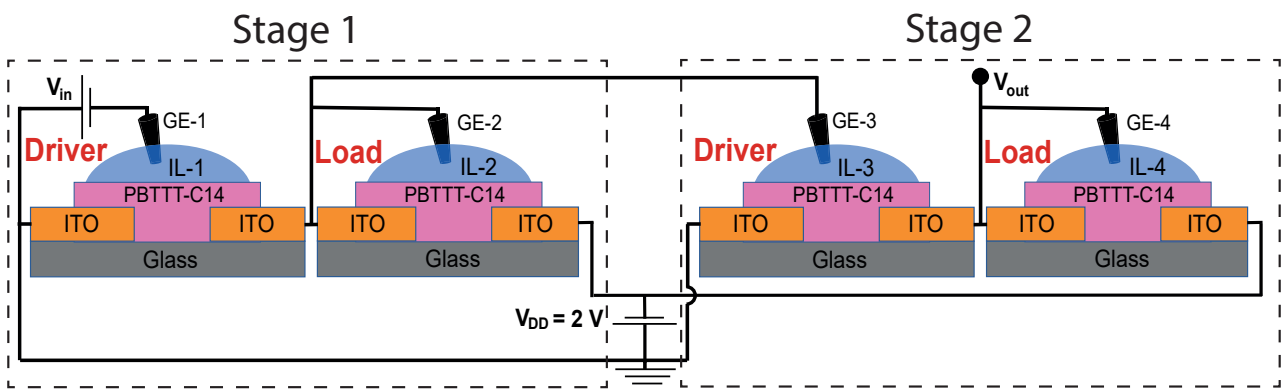

Figure S3: The schematic for the double inverter using IL-gated transistors.
